# Supplementary material for: Genome-Wide Association Mapping of Seedling Biomass and Root Traits Under Different Water Conditions in Wheat
Source: Front Genet. 2021 Apr 12;12:663557. doi: 10.3389/fgene.2021.663557 (PMC8072265; doi:10.3389/fgene.2021.663557)
Supplement: Supplementary file 2 [file Table_2.xlsx]

## Sheet: Sheet1
Table S2: The SNPs significantly associated with root traits in controlled and drought environments based on BLUP values. Trait abbreviation: root length in drought environment (RLD), root length in controlled environment (RLN), root number in drought environment (RND), root number in controlled environment (RNN), root dry weight in controlled environment (RDWN), root dry weight in dry environmen…
Trait	SNP	Chromosome	Position	P value	R2	Effect
RLD	Affx-111788461	2B	134238767	4.3e-05	0.210041	-0.15717
RLD	Affx-109472769	2D	134932479	5.2e-05	0.208424	0.128859
RLD	Affx-110648019	2B	192497253	5.7e-05	0.207524	-0.12786
RLD	Affx-109954100	2A	751172171	5.8e-05	0.207351	0.114168
RLD	Affx-110924067	2B	170950948	8.6e-05	0.203808	0.131665
RLD	Affx-111037840	2B	133542950	8.6e-05	0.20376	0.163634
RLD	Affx-88687624	2D	619709726	8.7e-05	0.203682	-0.1121
RLD	Affx-88684710	2B	191752650	9.8e-05	0.202582	0.125608
RLD	Affx-110043103	2B	193105741	0.000104	0.202041	0.124274
RLD	Affx-110507249	2B	652755140	0.000116	0.201097	0.110008
RLD	Affx-110337526	2A	750806757	0.000118	0.200924	-0.1102
RLD	Affx-111534108	2B	191878500	0.000119	0.200806	0.122077
RLD	Affx-110711804	2B	133306943	0.000129	0.200075	-0.14903
RLD	Affx-110776940	2B	133521710	0.000135	0.199696	0.144554
RLD	Affx-110800753	2B	572189844	0.000137	0.199546	-0.11623
RLD	Affx-109631192	2B	652599549	0.00014	0.19939	0.109564
RLD	Affx-109197921	2B	190977832	0.00014	0.199377	-0.12212
RLD	Affx-111020129	2B	132402515	0.000142	0.199237	-0.15066
RLD	Affx-110190977	2D	134804581	0.000147	0.198948	-0.11682
RLD	Affx-109544372	2B	195495534	0.000157	0.198352	-0.11853
RLD	Affx-110540404	2B	190969627	0.000168	0.197698	-0.11946
RLD	Affx-111072284	2B	190905956	0.000169	0.197664	-0.12098
RLD	Affx-110787959	2B	173292429	0.00018	0.197107	0.121705
RLD	Affx-110717978	2B	191706363	0.000184	0.196892	-0.11747
RLD	Affx-110242199	2B	193404402	0.000188	0.196715	-0.1201
RLD	Affx-109809148	2B	194414040	0.000209	0.195762	0.11793
RLD	Affx-110880615	2B	191359543	0.00021	0.195721	-0.11725
RLD	Affx-110786705	2B	132702955	0.000213	0.195598	-0.14787
RLD	Affx-111440958	2B	132355948	0.000232	0.194825	0.14379
RLD	Affx-111805701	2B	194364983	0.000235	0.194702	-0.11791
RLD	Affx-111566375	2B	190668651	0.000237	0.194659	0.11704
RLD	Affx-111974593	2B	132817938	0.000247	0.194275	0.143296
RLD	Affx-111531079	2B	190657526	0.000253	0.194069	0.116333
RLD	Affx-88733278	2B	197210361	0.000259	0.193841	0.116543
RLD	Affx-88637728	2B	171698584	0.000266	0.193627	-0.11663
RLD	Affx-109559457	2B	191881334	0.000271	0.193459	0.117273
RLD	Affx-111956199	1A	584539146	0.000274	0.193366	-0.09514
RLD	Affx-108981045	2B	190988233	0.000276	0.19329	0.115703
RLD	Affx-109458904	2B	547903196	0.000282	0.193106	-0.19541
RLD	Affx-109906692	2B	132984502	0.0003	0.192558	0.135674
RLD	Affx-110611411	2B	193214179	0.0003	0.192535	0.116671
RLD	Affx-109127911	2B	192235649	0.000326	0.191804	0.11547
RLD	Affx-110295983	2B	133940492	0.000337	0.1915	-0.14166
RLD	Affx-110348918	2B	652662630	0.000339	0.191447	0.10364
RLD	Affx-111816193	2B	132994848	0.000365	0.190809	-0.13878
RLD	Affx-110831465	2B	194824816	0.000369	0.1907	0.113646
RLD	Affx-109994194	2B	192741498	0.000372	0.190628	-0.1145
RLD	Affx-111333589	2B	173185824	0.000376	0.190532	0.11446
RLD	Affx-109249109	2B	170855678	0.000402	0.189941	0.113713
RLD	Affx-111642741	2D	181327818	0.000403	0.189931	0.105999
RLD	Affx-110625327	2B	194641393	0.000414	0.189689	0.113567
RLD	Affx-109893255	2B	192845003	0.000446	0.189032	0.111463
RLD	Affx-109145885	2B	170900374	0.000453	0.188891	-0.11242
RLD	Affx-110732927	2B	132805278	0.000456	0.188828	-0.13802
RLD	Affx-109385645	2B	172849837	0.000495	0.18812	0.112408
RLD	Affx-110885104	2B	191570108	0.000497	0.188085	0.112346
RLD	Affx-111756867	2B	169514829	0.000502	0.187988	0.112764
RLD	Affx-110352651	2B	190476829	0.000514	0.187779	0.112195
RLD	Affx-111037293	2B	652993444	0.000517	0.187738	0.097042
RLD	Affx-110156863	2D	134810466	0.000517	0.187734	-0.11148
RLD	Affx-109443389	2B	174319558	0.000517	0.187728	0.110827
RLD	Affx-109692890	2B	169919140	0.000537	0.187394	-0.11008
RLD	Affx-110558157	2B	192389346	0.000551	0.187176	-0.11083
RLD	Affx-109569515	2B	159217747	0.000572	0.186838	0.108614
RLD	Affx-88582292	2B	133847588	0.000594	0.186509	-0.1355
RLD	Affx-110803927	2B	192370220	0.000611	0.186265	-0.11042
RLD	Affx-110304736	2B	133817094	0.000611	0.186261	-0.13514
RLD	Affx-110954630	2B	132862102	0.000634	0.185933	0.135984
RLD	Affx-111742027	2B	157702490	0.000658	0.185608	0.104438
RLD	Affx-110007059	2B	172684258	0.000693	0.185158	0.109869
RLD	Affx-88804075	7D	28828579	0.000703	0.185038	0.11238
RLD	Affx-111462922	2B	168776396	0.000709	0.184964	0.10957
RLD	Affx-109155487	2B	193010549	0.000791	0.184003	-0.10662
RLD	Affx-111549166	2B	171042326	0.000812	0.183772	-0.10583
RLD	Affx-109672297	2B	238006275	0.000812	0.183769	-0.09888
RLD	Affx-109794475	2B	173415246	0.000879	0.183083	0.107323
RLD	Affx-111438699	2B	652657237	0.000909	0.182795	0.090895
RLD	Affx-88494196	2B	171032057	0.000953	0.182378	-0.10407
RLD	Affx-111145599	2B	193579021	0.000958	0.182332	0.10539
RLD	Affx-111246331	2B	621545424	0.000965	0.182271	0.091445
RLD	Affx-111321234	2B	236775910	0.000984	0.182105	-0.10864
RFWD	Affx-88637728	2B	171698584	8.1e-05	0.101474	-0.00265
RFWD	Affx-108994463	2B	171023842	8.4e-05	0.101103	0.002597
RFWD	Affx-92924630	6B	30357311	9e-05	0.100429	0.003984
RFWD	Affx-110993320	2D	465115842	0.000115	0.097908	-0.00248
RFWD	Affx-109794475	2B	173415246	0.000124	0.097165	0.002602
RFWD	Affx-110924067	2B	170950948	0.000128	0.096837	0.002689
RFWD	Affx-111532060	2B	173571287	0.000136	0.09623	0.002591
RFWD	Affx-111393044	2B	170410115	0.00015	0.095239	-0.00253
RFWD	Affx-110787959	2B	173292429	0.000163	0.094378	0.002575
RFWD	Affx-109385645	2B	172849837	0.000163	0.094342	0.002551
RFWD	Affx-111333589	2B	173185824	0.000168	0.094072	0.002543
RFWD	Affx-110103312	2D	470056509	0.00019	0.092819	-0.00238
RFWD	Affx-108976639	2D	463225114	0.000201	0.092269	0.002353
RFWD	Affx-111549166	2B	171042326	0.000213	0.09165	-0.00248
RFWD	Affx-109692890	2B	169919140	0.000228	0.090962	-0.00246
RFWD	Affx-109273402	2B	172178809	0.000238	0.090566	0.002478
RFWD	Affx-109443389	2B	174319558	0.000257	0.089778	0.002446
RFWD	Affx-88641086	2B	172223152	0.000258	0.089745	-0.00247
RFWD	Affx-110506688	2B	172214512	0.000271	0.089225	-0.00244
RFWD	Affx-111950778	3D	4972731	0.000279	0.088965	0.002161
RFWD	Affx-108868094	2B	169855841	0.000286	0.08871	0.002496
RFWD	Affx-88494196	2B	171032057	0.000291	0.088524	-0.0024
RFWD	Affx-111192303	2B	170794936	0.000295	0.088383	0.002448
RFWD	Affx-111667540	2B	170785230	0.000298	0.088296	-0.00243
RFWD	Affx-111701599	2B	171007954	0.000304	0.088093	-0.00243
RFWD	Affx-109997862	2D	463337050	0.000329	0.087282	-0.00227
RFWD	Affx-111216446	2B	171004035	0.000332	0.087201	0.002446
RFWD	Affx-108943670	6B	31635701	0.000345	0.086815	0.002241
RFWD	Affx-111756867	2B	169514829	0.000348	0.086727	0.002425
RFWD	Affx-109989551	2A	58977525	0.000351	0.086635	-0.00299
RFWD	Affx-109249109	2B	170855678	0.000351	0.086631	0.002407
RFWD	Affx-110744142	2A	62266854	0.000365	0.086259	0.002076
RFWD	Affx-111067888	2A	58706584	0.000365	0.086257	0.002893
RFWD	Affx-109786116	2B	172890823	0.000381	0.085816	0.002429
RFWD	Affx-88400567	2A	62215359	0.000406	0.085187	-0.00204
RFWD	Affx-110637327	2A	62203703	0.000433	0.084538	-0.00206
RFWD	Affx-109547041	2B	170788264	0.000457	0.083999	-0.00236
RFWD	Affx-110102779	5A	34109275	0.000497	0.083179	0.002244
RFWD	Affx-110007059	2B	172684258	0.000508	0.082951	0.002354
RFWD	Affx-111462922	2B	168776396	0.000524	0.08264	0.00235
RFWD	Affx-109422854	2B	171986654	0.000556	0.082061	0.002322
RFWD	Affx-110981742	6B	190282104	0.000559	0.082011	-0.00258
RFWD	Affx-109286645	2B	169610504	0.000564	0.081913	-0.00231
RFWD	Affx-109807185	2B	171179128	0.000565	0.081898	0.002335
RFWD	Affx-111822974	5A	34525213	0.000627	0.080865	-0.0022
RFWD	Affx-110477558	6B	194020289	0.000646	0.080567	0.002419
RFWD	Affx-108965631	2A	58763567	0.00066	0.080365	-0.00288
RFWD	Affx-110168506	6B	31014853	0.0007	0.079778	0.002137
RFWD	Affx-111231647	2B	170394738	0.000753	0.079058	-0.00229
RFWD	Affx-108986922	6B	190212316	0.000786	0.078638	-0.00242
RFWD	Affx-108904994	5B	707083513	0.000901	0.077293	-0.00228
RND	Affx-111718859	3A	11817684	2.4e-05	0.18307	0.122565
RND	Affx-110813508	5B	6580466	9.6e-05	0.169643	-0.09315
RND	Affx-88512574	4D	3398108	0.000118	0.167746	-0.17019
RND	Affx-110656000	3A	11809504	0.00012	0.167576	0.110408
RND	Affx-109885022	6B	194151525	0.000128	0.166999	-0.12344
RND	Affx-110375292	6B	195268158	0.000146	0.165731	0.12164
RND	Affx-88565514	3A	11823967	0.000229	0.161539	0.102655
RND	Affx-110494940	4A	513642113	0.00023	0.161475	-0.10815
RND	Affx-88682450	4D	3395221	0.000254	0.160559	0.16148
RND	Affx-110981742	6B	190282104	0.00027	0.160006	-0.12193
RND	Affx-109599332	2B	652289909	0.000302	0.158983	0.100936
RND	Affx-110262619	3B	59054850	0.000395	0.156485	-0.15128
RND	Affx-110477558	6B	194020289	0.00042	0.155925	0.111955
RND	Affx-88663299	2D	545040087	0.000437	0.155553	-0.09785
RND	Affx-88510656	4D	3431975	0.000448	0.155321	0.156378
RND	Affx-88454699	4D	3419078	0.000469	0.154903	-0.15523
RND	Affx-88440672	4D	3438746	0.000559	0.153297	0.152372
RND	Affx-110637327	2A	62203703	0.000613	0.152453	-0.08746
RND	Affx-109338503	2B	651722410	0.000687	0.151422	0.094625
RND	Affx-109386795	4D	3403289	0.00071	0.151122	-0.14939
RND	Affx-110503701	6B	454042636	0.00074	0.150738	-0.10762
RND	Affx-109932599	2B	652252092	0.000874	0.149232	0.093443
RND	Affx-92949392	6D	101254281	0.000976	0.148231	-0.12804
RND	Affx-111692547	6B	454068737	0.000985	0.148147	-0.10662
RDWD	Affx-88637728	2B	171698584	0.000131	0.130342	-0.00046
RDWD	Affx-108994463	2B	171023842	0.000258	0.123766	0.000435
RDWD	Affx-111117837	7A	681959675	0.000316	0.121805	-0.00038
RDWD	Affx-109794475	2B	173415246	0.00033	0.121403	0.000439
RDWD	Affx-111508660	7D	596314502	0.00033	0.121402	0.000363
RDWD	Affx-111062097	7A	682758775	0.000382	0.119976	-0.00038
RDWD	Affx-111393044	2B	170410115	0.000418	0.119104	-0.00042
RDWD	Affx-109443389	2B	174319558	0.000528	0.116879	0.000418
RDWD	Affx-108868094	2B	169855841	0.000608	0.115521	0.000424
RDWD	Affx-111532060	2B	173571287	0.000617	0.115384	0.000418
RDWD	Affx-88710915	7B	51067605	0.000635	0.115109	0.000627
RDWD	Affx-111333589	2B	173185824	0.000653	0.114844	0.000414
RDWD	Affx-111192303	2B	170794936	0.000662	0.114712	0.000415
RDWD	Affx-109741212	7D	43661878	0.000667	0.114647	-0.00036
RDWD	Affx-109286645	2B	169610504	0.000694	0.114271	-0.00041
RDWD	Affx-109385645	2B	172849837	0.000696	0.114247	0.000413
RDWD	Affx-110560750	7A	682131353	0.000718	0.113951	0.000361
RDWD	Affx-111549166	2B	171042326	0.000723	0.11388	-0.0004
RDWD	Affx-109780585	7D	596123085	0.000749	0.113548	-0.00034
RDWD	Affx-110506688	2B	172214512	0.000755	0.113463	-0.00041
RDWD	Affx-111131781	4B	600912197	0.000789	0.113049	-0.0004
RDWD	Affx-109273402	2B	172178809	0.000791	0.113027	0.000407
RDWD	Affx-109422854	2B	171986654	0.000833	0.112538	0.000405
RDWD	Affx-88494196	2B	171032057	0.000836	0.112507	-0.0004
RDWD	Affx-109807185	2B	171179128	0.000844	0.112413	0.000407
RDWD	Affx-109674557	6D	466129937	0.000865	0.112181	-0.00069
RDWD	Affx-110924067	2B	170950948	0.000881	0.112008	0.000419
RDWD	Affx-109861049	7D	604390926	0.000897	0.111834	-0.00052
RDWD	Affx-110986216	6D	466237019	0.00091	0.111698	-0.00068
RDWD	Affx-111756867	2B	169514829	0.000939	0.111404	0.000405
RDWD	Affx-111401029	4A	463077120	0.000953	0.111262	-0.00035
RDWD	Affx-88732107	7A	64932315	0.000957	0.111221	-0.00037
RDWD	Affx-111701599	2B	171007954	0.00099	0.110898	-0.0004
SFWD	Affx-109617080	2D	514348182	1.2e-05	0.140542	-0.00953
SFWD	Affx-109782056	2B	607064966	5.7e-05	0.124589	-0.00846
SFWD	Affx-111434051	2B	606938708	6.2e-05	0.123867	0.008745
SFWD	Affx-111191532	3D	570154327	0.000122	0.117021	0.008976
SFWD	Affx-111326878	2B	606037476	0.000137	0.11588	0.009263
SFWD	Affx-111525607	5B	241913718	0.000197	0.112289	0.006465
SFWD	Affx-111056669	3A	729724082	0.000251	0.109886	-0.00487
SFWD	Affx-88433496	5B	216860837	0.000282	0.108727	0.006683
SFWD	Affx-111843250	3A	729870857	0.000336	0.107032	-0.00455
SFWD	Affx-111424810	5B	208090524	0.000364	0.106224	0.006629
SFWD	Affx-111927901	5B	223627667	0.000377	0.105891	-0.00627
SFWD	Affx-111156530	5B	227543908	0.000386	0.105673	-0.00627
SFWD	Affx-108958044	3A	715330264	0.000392	0.105514	0.009852
SFWD	Affx-110550802	5B	231278852	0.000416	0.104925	-0.00645
SFWD	Affx-110958722	2B	603198118	0.000528	0.102617	0.007362
SFWD	Affx-92730180	7A	617949946	0.000536	0.102456	0.007089
SFWD	Affx-111127553	5B	230772130	0.000547	0.102265	0.006127
SFWD	Affx-110482829	5B	240280792	0.000605	0.101281	-0.00606
SFWD	Affx-111239762	3A	715966079	0.000606	0.101275	0.008354
SFWD	Affx-109535493	5B	242566774	0.000622	0.101022	0.005977
SFWD	Affx-109373838	5B	196209923	0.000648	0.100618	-0.00616
SFWD	Affx-92166801	7B	733528530	0.000662	0.100419	-0.00443
SFWD	Affx-110665311	5B	241011751	0.0007	0.099873	0.005859
SFWD	Affx-110136159	5B	221375964	0.000703	0.099831	-0.00622
SFWD	Affx-110149632	5D	244617800	0.000704	0.099824	-0.00586
SFWD	Affx-109708248	5B	229062078	0.000737	0.099374	0.006115
SFWD	Affx-111839493	5B	225706804	0.000739	0.09935	-0.00592
SFWD	Affx-110237710	5B	239395035	0.000748	0.099233	0.006659
SFWD	Affx-111567331	5B	224064083	0.000758	0.099108	-0.00607
SFWD	Affx-110993320	2D	465115842	0.000763	0.099052	-0.00474
SFWD	Affx-109076617	5B	178290549	0.000778	0.098863	0.005887
SFWD	Affx-111894001	5B	236255230	0.000792	0.098682	-0.00586
SFWD	Affx-110380751	5B	223931631	0.0008	0.098584	0.005857
SFWD	Affx-111199069	3A	686747406	0.000814	0.098426	-0.00541
SFWD	Affx-109572999	5B	222943784	0.000818	0.098377	0.005828
SFWD	Affx-109552032	5A	230068014	0.000824	0.098307	0.00586
SFWD	Affx-88535649	7D	23983740	0.000824	0.098305	0.004426
SFWD	Affx-108849682	5B	229214421	0.000843	0.098085	-0.00574
SFWD	Affx-110026338	5B	226942750	0.000844	0.098072	0.005641
SFWD	Affx-108901378	5B	223304363	0.000854	0.097959	-0.00589
SFWD	Affx-110942710	5B	221227493	0.000862	0.097869	-0.00586
SFWD	Affx-111781335	5B	220000778	0.000869	0.097797	-0.0058
SFWD	Affx-111545164	5B	206888434	0.000885	0.097621	-0.00589
SFWD	Affx-88610976	4B	36636157	0.000888	0.097584	0.004394
SFWD	Affx-111089889	5B	227747303	0.0009	0.097454	-0.00577
SFWD	Affx-110966256	1B	527632148	0.000916	0.097288	0.005297
SFWD	Affx-109550976	5B	174124702	0.000934	0.097094	-0.00571
SFWD	Affx-111161632	7B	687033694	0.000939	0.097046	0.004789
SFWD	Affx-108855788	5B	228169829	0.000939	0.097045	-0.00582
SFWD	Affx-92299787	5D	218560316	0.000949	0.096945	-0.00582
SFWD	Affx-110227812	5B	243748388	0.00095	0.096933	0.005737
SFWD	Affx-88736269	5B	237169031	0.000983	0.09661	0.00579
SFWD	Affx-110412382	5B	227326359	0.000983	0.096604	-0.00574
SDWD	Affx-109617080	2D	514348182	1.1e-05	0.205409	-0.00153
SDWD	Affx-111326878	2B	606037476	5.7e-05	0.189456	0.001558
SDWD	Affx-109782056	2B	607064966	0.000109	0.183454	-0.0013
SDWD	Affx-108958044	3A	715330264	0.000111	0.183239	0.001641
SDWD	Affx-111843250	3A	729870857	0.000113	0.183123	-0.00077
SDWD	Affx-111434051	2B	606938708	0.000171	0.17929	0.001304
SDWD	Affx-110966256	1B	527632148	0.000205	0.177634	0.000966
SDWD	Affx-111525607	5B	241913718	0.000206	0.177592	0.001071
SDWD	Affx-109674658	4B	37700884	0.000223	0.176872	0.000828
SDWD	Affx-92897136	2B	641102486	0.000239	0.176236	-0.0013
SDWD	Affx-111239762	3A	715966079	0.000244	0.176045	0.001339
SDWD	Affx-109708248	5B	229062078	0.000267	0.175229	0.001112
SDWD	Affx-111601113	2B	448398290	0.000273	0.175028	-0.00136
SDWD	Affx-109300772	4B	37688483	0.000286	0.174576	0.000801
SDWD	Affx-111982681	3A	686764011	0.000313	0.173756	0.001005
SDWD	Affx-111956258	3D	572553080	0.000322	0.173507	-0.00078
SDWD	Affx-110665311	5B	241011751	0.000324	0.173447	0.001045
SDWD	Affx-109535493	5B	242566774	0.00035	0.172754	0.001055
SDWD	Affx-88425798	2D	375362652	0.000353	0.172678	-0.00129
SDWD	Affx-111089889	5B	227747303	0.000384	0.171922	-0.00104
SDWD	Affx-88444969	4B	37845625	0.0004	0.171554	0.000784
SDWD	Affx-88801536	1B	527373539	0.0004	0.171546	-0.00093
SDWD	Affx-110975752	5B	239978472	0.000402	0.171507	-0.00095
SDWD	Affx-109752659	5B	220564968	0.000423	0.171035	-0.00104
SDWD	Affx-111056669	3A	729724082	0.000424	0.171019	-0.00074
SDWD	Affx-111733432	2B	611070936	0.00044	0.170674	-0.00108
SDWD	Affx-110026338	5B	226942750	0.000441	0.170671	0.00099
SDWD	Affx-111175665	2B	613233795	0.000468	0.170126	-0.00102
SDWD	Affx-109572999	5B	222943784	0.000478	0.169942	0.001025
SDWD	Affx-111781335	5B	220000778	0.000493	0.169657	-0.00103
SDWD	Affx-111496281	5B	229475759	0.000517	0.169226	0.001008
SDWD	Affx-110237710	5B	239395035	0.000523	0.169131	0.001134
SDWD	Affx-109979441	1B	533184310	0.000527	0.169062	0.000978
SDWD	Affx-111863767	3B	32015119	0.000537	0.168882	0.000776
SDWD	Affx-110677122	5B	238559696	0.000543	0.168787	-0.001
SDWD	Affx-88471775	2B	614331210	0.000547	0.168716	0.000976
SDWD	Affx-110775945	5B	221249180	0.000577	0.168236	-0.00101
SDWD	Affx-111513856	5B	225108469	0.000586	0.168111	-0.00101
SDWD	Affx-111406780	5B	225592215	0.000586	0.168111	0.001009
SDWD	Affx-110886191	3A	729752065	0.000587	0.168089	0.00068
SDWD	Affx-88596529	4B	37735225	0.000604	0.167833	-0.00077
SDWD	Affx-109024612	1B	526433539	0.000627	0.167494	-0.00096
SDWD	Affx-110251150	5B	224654945	0.000636	0.167373	-0.00099
SDWD	Affx-110380751	5B	223931631	0.000641	0.167302	0.001005
SDWD	Affx-111894001	5B	236255230	0.000645	0.167249	-0.00101
SDWD	Affx-110599972	1B	526560541	0.000665	0.166967	-0.00088
SDWD	Affx-111161632	7B	687033694	0.000667	0.166938	0.000768
SDWD	Affx-110370379	2B	615262170	0.000673	0.166868	-0.00097
SDWD	Affx-110887047	2B	507508248	0.000688	0.166659	-0.00118
SDWD	Affx-108935742	3B	31341291	0.000692	0.166613	-0.00081
SDWD	Affx-111934018	5B	231945805	0.000708	0.166414	0.000969
SDWD	Affx-88736269	5B	237169031	0.00071	0.166386	0.001004
SDWD	Affx-111044291	5B	234889353	0.000712	0.166361	-0.00097
SDWD	Affx-111946998	3A	715444269	0.000726	0.166189	-0.00125
SDWD	Affx-109076617	5B	178290549	0.000726	0.16618	0.000996
SDWD	Affx-109754679	3A	686742882	0.000738	0.166043	-0.00099
SDWD	Affx-111868169	5B	219083298	0.000778	0.165563	-0.00096
SDWD	Affx-88668343	1D	397069107	0.000791	0.165413	0.000971
SDWD	Affx-109254520	2B	572628107	0.000801	0.165308	0.001277
SDWD	Affx-88370759	2B	612686899	0.000802	0.165299	-0.00097
SDWD	Affx-108903562	5B	242022739	0.000806	0.16525	0.000962
SDWD	Affx-88789006	5B	224625241	0.000816	0.165135	0.000972
SDWD	Affx-109414212	5B	241977328	0.000827	0.165018	-0.00099
SDWD	Affx-111468167	1B	532372268	0.00084	0.164879	-0.00097
SDWD	Affx-111068828	2B	610389836	0.000856	0.164716	0.000955
SDWD	Affx-111674582	2B	522815586	0.000877	0.164495	0.001146
SDWD	Affx-109752778	5B	227344497	0.000907	0.164194	-0.00097
SDWD	Affx-109552032	5A	230068014	0.000926	0.164018	0.000971
SDWD	Affx-109484663	2B	572842389	0.000933	0.163948	-0.00121
SDWD	Affx-88701379	5B	231732411	0.00095	0.163782	0.000941
SDWD	Affx-111928570	2B	574043720	0.000958	0.163707	0.001222
SDWD	Affx-109205655	6D	145639351	0.001	0.163333	-0.0008
TFWD	Affx-110993320	2D	465115842	4.6e-05	0.101586	-0.00745
TFWD	Affx-108976639	2D	463225114	9.8e-05	0.093784	0.006998
TFWD	Affx-111525607	5B	241913718	0.00011	0.092597	0.008716
TFWD	Affx-109997862	2D	463337050	0.000136	0.090471	-0.00685
TFWD	Affx-88433496	5B	216860837	0.000155	0.08914	0.009043
TFWD	Affx-110103312	2D	470056509	0.000155	0.089111	-0.00683
TFWD	Affx-109617080	2D	514348182	0.00018	0.087595	-0.01047
TFWD	Affx-110149632	5D	244617800	0.000208	0.086139	-0.00834
TFWD	Affx-111156530	5B	227543908	0.000243	0.084559	-0.00841
TFWD	Affx-110482829	5B	240280792	0.000253	0.084126	-0.0084
TFWD	Affx-88535649	7D	23983740	0.000325	0.081623	0.006154
TFWD	Affx-111127553	5B	230772130	0.000327	0.081556	0.008274
TFWD	Affx-110380751	5B	223931631	0.00035	0.080872	0.00812
TFWD	Affx-111424810	5B	208090524	0.00035	0.080858	0.008619
TFWD	Affx-111927901	5B	223627667	0.000354	0.080755	-0.00817
TFWD	Affx-110665311	5B	241011751	0.000359	0.080594	0.008014
TFWD	Affx-109535493	5B	242566774	0.00037	0.080305	0.008081
TFWD	Affx-111089889	5B	227747303	0.000413	0.079185	-0.00798
TFWD	Affx-111513856	5B	225108469	0.000441	0.078541	-0.00794
TFWD	Affx-111406780	5B	225592215	0.000441	0.078541	0.007945
TFWD	Affx-111781335	5B	220000778	0.000444	0.078471	-0.00795
TFWD	Affx-109076617	5B	178290549	0.000449	0.078353	0.007986
TFWD	Affx-109552032	5A	230068014	0.000469	0.077916	0.007958
TFWD	Affx-111839493	5B	225706804	0.000475	0.077797	-0.00796
TFWD	Affx-111894001	5B	236255230	0.00048	0.077691	-0.00792
TFWD	Affx-110550802	5B	231278852	0.000493	0.077416	-0.00825
TFWD	Affx-108849682	5B	229214421	0.000504	0.077203	-0.00777
TFWD	Affx-111496281	5B	229475759	0.000513	0.077014	0.007794
TFWD	Affx-108901378	5B	223304363	0.000518	0.076924	-0.00796
TFWD	Affx-111337238	5B	244297910	0.000531	0.076676	0.007888
TFWD	Affx-110026338	5B	226942750	0.000533	0.076642	0.007598
TFWD	Affx-109373838	5B	196209923	0.000541	0.07649	-0.00811
TFWD	Affx-111567331	5B	224064083	0.000544	0.076433	-0.00809
TFWD	Affx-109752659	5B	220564968	0.000548	0.076365	-0.00785
TFWD	Affx-109572999	5B	222943784	0.000552	0.0763	0.007812
TFWD	Affx-109708248	5B	229062078	0.000561	0.076126	0.008113
TFWD	Affx-109550976	5B	174124702	0.000568	0.076008	-0.00772
TFWD	Affx-110227812	5B	243748388	0.000572	0.075935	0.007762
TFWD	Affx-108855788	5B	228169829	0.000575	0.075887	-0.00787
TFWD	Affx-110412382	5B	227326359	0.000582	0.07577	-0.00779
TFWD	Affx-92299787	5D	218560316	0.000583	0.075739	-0.00786
TFWD	Affx-111044291	5B	234889353	0.000586	0.0757	-0.00764
TFWD	Affx-88737307	5B	240977844	0.000596	0.075528	-0.00785
TFWD	Affx-111434051	2B	606938708	0.000605	0.075377	0.009621
TFWD	Affx-88701379	5B	231732411	0.000614	0.075224	0.007583
TFWD	Affx-110942710	5B	221227493	0.000619	0.075152	-0.00781
TFWD	Affx-108903562	5B	242022739	0.000628	0.074998	0.007582
TFWD	Affx-92305436	5D	221148316	0.000632	0.074935	0.007696
TFWD	Affx-109414212	5B	241977328	0.000635	0.0749	-0.0078
TFWD	Affx-88736269	5B	237169031	0.000635	0.074899	0.007797
TFWD	Affx-111545164	5B	206888434	0.000636	0.074877	-0.00785
TFWD	Affx-111948857	5B	233899083	0.000639	0.074827	0.007827
TFWD	Affx-110325239	5B	180062668	0.000672	0.074336	0.00777
TFWD	Affx-110857432	5B	222694303	0.000672	0.074336	0.00777
TFWD	Affx-88348615	5B	180022460	0.000672	0.074336	0.00777
TFWD	Affx-110237710	5B	239395035	0.000698	0.073951	0.008681
TFWD	Affx-92166801	7B	733528530	0.000701	0.073909	-0.00569
TFWD	Affx-110251150	5B	224654945	0.00074	0.073372	-0.00758
TFWD	Affx-111454930	5B	219279312	0.00074	0.073368	-0.00782
TFWD	Affx-110136159	5B	221375964	0.000744	0.073326	-0.00802
TFWD	Affx-88610976	4B	36636157	0.000754	0.073184	0.005763
TFWD	Affx-111191532	3D	570154327	0.000756	0.073161	0.010097
TFWD	Affx-110348997	5B	132915101	0.000758	0.073137	-0.00729
TFWD	Affx-109782056	2B	607064966	0.000765	0.073042	-0.00909
TFWD	Affx-109759447	5B	222111136	0.00077	0.072984	0.007674
TFWD	Affx-110231086	5B	231148423	0.000783	0.072809	0.007512
TFWD	Affx-110283907	5B	233348108	0.000783	0.072809	0.007658
TFWD	Affx-88789006	5B	224625241	0.000797	0.072639	0.007549
TFWD	Affx-110677122	5B	238559696	0.000817	0.072388	-0.00756
TFWD	Affx-110956065	5B	224287406	0.000821	0.072342	-0.00757
TFWD	Affx-88424302	5D	162423530	0.00083	0.072238	-0.00759
TFWD	Affx-111934018	5B	231945805	0.000837	0.072147	0.007427
TFWD	Affx-109210705	5B	225562731	0.000839	0.072127	0.007525
TFWD	Affx-88556262	1D	317446091	0.000846	0.072045	-0.00764
TFWD	Affx-109746541	5B	227520438	0.000861	0.071876	0.007512
TFWD	Affx-109563182	5B	220836775	0.000861	0.071872	-0.00762
TFWD	Affx-111868169	5B	219083298	0.000877	0.071688	-0.00736
TFWD	Affx-110925882	5D	152752730	0.000882	0.071633	0.007633
TFWD	Affx-109689042	5B	234774305	0.000885	0.071597	-0.00752
TFWD	Affx-110067966	5B	221355593	0.000893	0.071506	-0.00747
TFWD	Affx-110285919	5B	234173613	0.000895	0.071493	0.007412
TFWD	Affx-110331263	5B	232290785	0.000896	0.071482	-0.00764
TFWD	Affx-109651500	5B	237806645	0.000899	0.07144	-0.00758
TFWD	Affx-110794384	5B	189196722	0.000909	0.071336	-0.00751
TFWD	Affx-109209847	5B	228779604	0.000934	0.071069	0.007564
TFWD	Affx-110876554	5B	169847880	0.000934	0.071069	-0.00746
TFWD	Affx-110170710	5B	242445198	0.000942	0.070977	0.00747
TFWD	Affx-111124347	5B	242672563	0.000949	0.070903	0.007426
TFWD	Affx-111020711	5B	226427356	0.000955	0.070849	0.007548
TFWD	Affx-110775945	5B	221249180	0.000962	0.070776	-0.00746
TFWD	Affx-111564243	5A	34303278	0.000965	0.070741	-0.00573
TDWD	Affx-109617080	2D	514348182	0.000105	0.153794	-0.00186
TDWD	Affx-111525607	5B	241913718	0.000237	0.146034	0.001481
TDWD	Affx-111843250	3A	729870857	0.000411	0.140847	-0.00098
TDWD	Affx-110665311	5B	241011751	0.000505	0.138923	0.001413
TDWD	Affx-109708248	5B	229062078	0.000519	0.138669	0.001478
TDWD	Affx-110966256	1B	527632148	0.000522	0.138615	0.001256
TDWD	Affx-111089889	5B	227747303	0.00057	0.137793	-0.00141
TDWD	Affx-111434051	2B	606938708	0.000603	0.137268	0.001654
TDWD	Affx-109535493	5B	242566774	0.000625	0.136939	0.001411
TDWD	Affx-109782056	2B	607064966	0.000655	0.136509	-0.00158
TDWD	Affx-109752659	5B	220564968	0.000665	0.136368	-0.0014
TDWD	Affx-88535649	7D	23983740	0.000672	0.13627	0.000979
TDWD	Affx-111956258	3D	572553080	0.000682	0.136127	-0.00102
TDWD	Affx-111496281	5B	229475759	0.000698	0.135915	0.001377
TDWD	Affx-88725288	7D	611763519	0.000714	0.135712	-0.00094
TDWD	Affx-109300772	4B	37688483	0.000719	0.135643	0.001039
TDWD	Affx-111781335	2B	220000778	0.000761	0.135111	-0.00139
TDWD	Affx-109674658	4B	37700884	0.000767	0.135047	0.001049
TDWD	Affx-109979441	1B	533184310	0.000772	0.134982	0.001322
TDWD	Affx-111406780	5B	225592215	0.000787	0.134799	0.001378
TDWD	Affx-111513856	5B	225108469	0.000787	0.134799	-0.00138
TDWD	Affx-110026338	5B	226942750	0.00079	0.134766	0.00132
TDWD	Affx-88801536	1B	527373539	0.000792	0.134744	-0.00123
TDWD	Affx-111068828	2B	610389836	0.000797	0.13469	0.00134
TDWD	Affx-110380751	5B	223931631	0.000835	0.134251	0.001375
TDWD	Affx-111800880	7B	687068740	0.000839	0.134215	-0.00105
TDWD	Affx-110599972	1B	526560541	0.000871	0.133869	-0.0012
TDWD	Affx-111326878	2B	606037476	0.000898	0.133583	0.001779
TDWD	Affx-111674582	2B	522815586	0.00091	0.133462	0.001594
TDWD	Affx-110149632	5D	244617800	0.000913	0.133433	-0.00133
TDWD	Affx-110886191	3A	729752065	0.000925	0.133315	0.000912
TDWD	Affx-111056669	3A	729724082	0.000925	0.133307	-0.00096
TDWD	Affx-110775945	5B	221249180	0.000932	0.133237	-0.00136
TDWD	Affx-110326629	7A	701658624	0.000946	0.133102	-0.00092
RLN	Affx-88769160	7B	677452446	8.6e-05	0.238992	0.263882
RLN	Affx-109605362	7D	101030085	0.000301	0.228252	-0.26854
RLN	Affx-111975239	1B	565516995	0.000367	0.226584	0.203555
RLN	Affx-110380533	1B	565460056	0.000412	0.225602	0.204535
RLN	Affx-92109571	7B	682891680	0.000472	0.224458	0.205101
RLN	Affx-108900837	4B	642603013	0.000493	0.224084	0.22482
RLN	Affx-110565419	4B	642543423	0.000544	0.223262	0.224142
RLN	Affx-110559026	2B	78945274	0.000546	0.223232	0.208415
RLN	Affx-88407781	1B	565524310	0.000553	0.223128	0.19799
RLN	Affx-110645660	3B	556927128	0.000737	0.220714	-0.20036
RLN	Affx-109359378	1B	564637325	0.000796	0.220079	-0.1999
RLN	Affx-111516789	1A	539978187	0.000819	0.219843	0.16494
RLN	Affx-109434039	7D	100995125	0.000832	0.21971	0.248555
RLN	Affx-88663716	4B	642547506	0.000966	0.218464	0.213539
RNN	Affx-108905447	6D	469095706	4e-06	0.341753	0.350447
RNN	Affx-109538680	6D	469170565	2.8e-05	0.325958	0.330251
RNN	Affx-88467992	6D	469074253	3e-05	0.325425	0.320452
RNN	Affx-109990803	6D	469118666	3.5e-05	0.324097	-0.3232
RNN	Affx-110869243	6D	469120733	5.6e-05	0.320408	-0.3244
RNN	Affx-88610870	6D	469108519	0.000113	0.315006	0.314237
RNN	Affx-110613850	7D	188187265	0.000169	0.311915	0.310575
RNN	Affx-111473198	6D	469069756	0.00018	0.311408	-0.30265
RNN	Affx-109459803	6D	469139515	0.000218	0.309929	0.30405
RNN	Affx-109718829	6A	499788929	0.000252	0.308836	-0.15534
RNN	Affx-110174358	3B	555302838	0.000256	0.308697	0.174149
RNN	Affx-111277876	3B	583387180	0.000281	0.307989	0.189981
RNN	Affx-110064630	6A	19127726	0.000284	0.307915	-0.16917
RNN	Affx-110737521	3D	445291257	0.000285	0.307894	-0.19472
RNN	Affx-110670198	2B	436000020	0.000292	0.307692	-0.27023
RNN	Affx-111310532	2B	434945192	0.000302	0.307456	0.270341
RNN	Affx-111601113	2B	448398290	0.000323	0.306938	-0.27402
RNN	Affx-109679492	5B	411664680	0.000326	0.306863	-0.19
RNN	Affx-110668959	5B	410266439	0.000342	0.30651	-0.19096
RNN	Affx-110307278	5B	410965458	0.000347	0.306383	0.188761
RNN	Affx-111959387	5B	406295143	0.000371	0.305879	-0.20054
RNN	Affx-110023588	3B	583729173	0.000381	0.305687	0.181643
RNN	Affx-109783345	3B	599146252	0.000381	0.305681	-0.1575
RNN	Affx-110505088	5B	404745837	0.000391	0.305482	0.190394
RNN	Affx-111350195	2B	425793881	0.000404	0.305232	-0.25829
RNN	Affx-88792658	6D	468876800	0.000413	0.305059	0.308261
RNN	Affx-111012917	5B	408636414	0.000422	0.304898	0.186986
RNN	Affx-111432837	5B	404812668	0.000432	0.304728	-0.18374
RNN	Affx-109891443	5B	405767302	0.000465	0.304165	0.187828
RNN	Affx-109596928	2B	421260518	0.000485	0.303847	-0.26296
RNN	Affx-110727225	5B	406190097	0.000504	0.30356	0.192942
RNN	Affx-110498551	5B	407416277	0.000544	0.302986	0.178418
RNN	Affx-110113777	3B	583105296	0.000591	0.302367	-0.18573
RNN	Affx-111348789	5B	409603682	0.000608	0.302144	0.179392
RNN	Affx-109945638	5B	405789776	0.000617	0.302038	-0.17704
RNN	Affx-111729610	5B	410724987	0.000622	0.30197	0.178775
RNN	Affx-110081317	1B	563646667	0.00067	0.301418	0.264128
RNN	Affx-109261582	5B	84613563	0.000678	0.30133	0.175113
RNN	Affx-88425798	2D	375362652	0.000688	0.301223	-0.24892
RNN	Affx-88763990	3B	583828519	0.000701	0.301082	-0.17997
RNN	Affx-111047224	5B	405846159	0.000754	0.300532	-0.17629
RNN	Affx-109463389	5B	422071767	0.000756	0.300511	0.174912
RNN	Affx-88471088	3A	731225304	0.000778	0.300293	-0.17855
RNN	Affx-111032869	6D	469022291	0.000801	0.300083	0.297096
RNN	Affx-109097963	5B	430360218	0.000806	0.300031	0.162155
RNN	Affx-88614796	4B	429096804	0.000822	0.299886	0.155116
RNN	Affx-88801886	6D	468954661	0.000827	0.299836	-0.27704
RNN	Affx-111742410	5B	421859895	0.000837	0.29975	-0.17168
RNN	Affx-110641568	2B	435481560	0.00087	0.299457	0.242716
RNN	Affx-111519927	6D	469025436	0.000896	0.299241	-0.28817
RNN	Affx-111088371	5B	410877760	0.000903	0.299182	-0.17479
RNN	Affx-88699103	2B	435513114	0.000907	0.299147	0.243004
RNN	Affx-109812686	2B	555504423	0.000929	0.298972	-0.14599
RNN	Affx-111232527	5D	348500141	0.000935	0.29892	0.174686
RNN	Affx-111489709	5B	405284090	0.000947	0.298829	0.17463
RNN	Affx-110100845	3B	560890254	0.000998	0.29844	0.150848
RFWN	Affx-111174209	4D	77898197	4.4e-05	0.167363	0.009599
RFWN	Affx-109528132	6A	6584259	5.4e-05	0.165519	-0.01045
RFWN	Affx-110174358	3B	555302838	6.4e-05	0.16388	0.01047
RFWN	Affx-111529105	6A	6567618	8.5e-05	0.161086	-0.00947
RFWN	Affx-88673044	4D	75228711	0.000138	0.156511	0.008984
RFWN	Affx-110457647	6A	3917946	0.00014	0.156346	0.011039
RFWN	Affx-111932364	4D	77018661	0.000141	0.156302	0.008858
RFWN	Affx-110932593	6D	5855231	0.000148	0.155811	-0.00943
RFWN	Affx-111731002	4D	84309005	0.000159	0.155134	-0.00898
RFWN	Affx-109296928	6A	6610283	0.00017	0.154536	0.009565
RFWN	Affx-110275420	4D	75273686	0.000179	0.15401	0.008797
RFWN	Affx-111246065	4D	77697819	0.000182	0.153869	0.008533
RFWN	Affx-110903673	4D	81637695	0.000208	0.152616	-0.00863
RFWN	Affx-88498049	6A	6564043	0.00021	0.152535	0.009528
RFWN	Affx-110396363	6A	5506814	0.000212	0.152414	-0.00945
RFWN	Affx-110261715	6A	5855688	0.000225	0.151882	-0.00923
RFWN	Affx-109562642	6D	5816621	0.000226	0.151824	-0.00925
RFWN	Affx-109655050	5B	83536608	0.000253	0.150764	-0.01038
RFWN	Affx-88597176	5B	78245788	0.000259	0.150545	0.010257
RFWN	Affx-88780962	5B	86237831	0.00029	0.149481	0.010392
RFWN	Affx-110449315	5B	79465105	0.000344	0.147891	0.010186
RFWN	Affx-111517168	5B	77002513	0.000344	0.147891	0.010186
RFWN	Affx-111432837	5B	404812668	0.000358	0.147519	-0.01002
RFWN	Affx-110709999	6A	4093348	0.000373	0.147135	0.010094
RFWN	Affx-88546137	3B	556031110	0.00038	0.146969	-0.00935
RFWN	Affx-88540902	5B	78732812	0.000383	0.146896	-0.01013
RFWN	Affx-110246796	5B	86718020	0.000384	0.146859	-0.0101
RFWN	Affx-109877045	5B	85661857	0.000409	0.14628	-0.01005
RFWN	Affx-111954760	5B	84980775	0.000428	0.145857	0.010004
RFWN	Affx-88486868	5B	84936584	0.000462	0.145143	-0.01003
RFWN	Affx-111550157	5B	84692531	0.000476	0.144866	0.009939
RFWN	Affx-110149553	4D	86781839	0.000481	0.144773	0.008214
RFWN	Affx-109055035	3B	570630554	0.000518	0.144074	0.009
RFWN	Affx-109161517	5B	76160548	0.00052	0.144044	0.009864
RFWN	Affx-88446000	1B	559960606	0.000526	0.143934	-0.01239
RFWN	Affx-111026355	6A	5098590	0.000535	0.143787	-0.01001
RFWN	Affx-111614550	5B	84175618	0.000542	0.143669	0.009824
RFWN	Affx-110881641	5B	74972662	0.000557	0.143404	0.009693
RFWN	Affx-110059352	5D	77738248	0.000566	0.143264	-0.0098
RFWN	Affx-111588818	5B	84653521	0.000577	0.143075	-0.00967
RFWN	Affx-88755267	5D	346638806	0.000593	0.142827	-0.00967
RFWN	Affx-111746907	6A	6823650	0.000609	0.142586	0.009288
RFWN	Affx-111730062	4D	85116761	0.000624	0.142352	0.008115
RFWN	Affx-109503300	5B	82232984	0.000662	0.141818	-0.00942
RFWN	Affx-88622603	1D	435507664	0.000695	0.141367	0.009599
RFWN	Affx-109313056	5B	85213600	0.000697	0.141337	-0.0094
RFWN	Affx-110668959	5B	410266439	0.000697	0.141332	-0.00966
RFWN	Affx-111329104	6A	5881692	0.000703	0.141259	-0.0108
RFWN	Affx-111155085	7D	32938156	0.000711	0.141151	0.00884
RFWN	Affx-109570800	5B	75707949	0.000737	0.140829	0.009557
RFWN	Affx-110566372	5B	76411502	0.000773	0.140383	-0.00929
RFWN	Affx-111840298	5D	73764556	0.000785	0.140239	-0.00938
RFWN	Affx-109504562	5B	78486989	0.000789	0.140201	0.009595
RFWN	Affx-110542833	6A	3801320	0.000826	0.139777	0.008256
RFWN	Affx-111561930	5B	87650456	0.000855	0.139458	0.009326
RFWN	Affx-88475929	5B	87232237	0.000855	0.139458	0.009326
RFWN	Affx-110161992	5B	404423060	0.000858	0.139423	0.009341
RFWN	Affx-111049795	5B	85652037	0.000864	0.139366	0.009362
RFWN	Affx-109981670	3B	556044117	0.000874	0.139257	-0.0087
RFWN	Affx-111917554	6A	5541511	0.000881	0.139178	-0.00953
RFWN	Affx-111007927	6A	6188337	0.000885	0.139137	0.008255
RFWN	Affx-111137755	3B	560731293	0.000902	0.138968	-0.0086
RFWN	Affx-110086253	5B	86544686	0.000909	0.138899	-0.00925
RFWN	Affx-111914319	6A	5901663	0.000917	0.138816	-0.0105
RFWN	Affx-110100845	3B	560890254	0.000924	0.138746	0.008305
RFWN	Affx-110753945	5B	83039426	0.000962	0.138379	-0.00947
RFWN	Affx-111047224	5B	405846159	0.000967	0.138332	-0.00926
RFWN	Affx-92561193	3D	571359458	0.000977	0.138234	0.014786
RFWN	Affx-110548870	7D	32702170	0.000981	0.1382	-0.00866
RFWN	Affx-110727225	5B	406190097	0.00099	0.138111	0.009879
RFWN	Affx-111268028	5B	87959012	0.000998	0.138039	-0.00947
RDWN	Affx-111529105	6A	6567618	5.3e-05	0.181894	-0.00067
RDWN	Affx-111329104	6A	5881692	6e-05	0.180724	-0.00089
RDWN	Affx-110457647	6A	3917946	6.2e-05	0.180363	0.000803
RDWN	Affx-109313104	2B	247557022	0.000106	0.175323	0.00082
RDWN	Affx-111917554	6A	5541511	0.000107	0.175198	-0.00077
RDWN	Affx-109528132	6A	6584259	0.000109	0.175091	-0.00069
RDWN	Affx-111543991	6A	6839108	0.000157	0.171643	0.000796
RDWN	Affx-111914319	6A	5901663	0.000161	0.17143	-0.00083
RDWN	Affx-109296928	6A	6610283	0.000168	0.171024	0.000661
RDWN	Affx-88498049	6A	6564043	0.000189	0.169938	0.000663
RDWN	Affx-111870350	2B	246538970	0.000189	0.16993	-0.0008
RDWN	Affx-110709999	6A	4093348	0.000197	0.169571	0.00073
RDWN	Affx-108923208	2B	246424603	0.000203	0.169262	0.000797
RDWN	Affx-88611376	2B	247615412	0.000206	0.169144	0.000818
RDWN	Affx-88780962	5B	86237831	0.000211	0.16892	0.000738
RDWN	Affx-88597176	5B	78245788	0.000235	0.16793	0.000717
RDWN	Affx-109655050	5B	83536608	0.000237	0.167859	-0.00072
RDWN	Affx-111026355	6A	5098590	0.000238	0.167817	-0.00074
RDWN	Affx-111731002	4D	84309005	0.000251	0.167333	-0.0006
RDWN	Affx-88540902	5B	78732812	0.000257	0.167101	-0.00072
RDWN	Affx-110932593	6D	5855231	0.000258	0.167075	-0.00063
RDWN	Affx-110449315	5B	79465105	0.000263	0.166906	0.000721
RDWN	Affx-111517168	5B	77002513	0.000263	0.166906	0.000721
RDWN	Affx-110261715	6A	5855688	0.000269	0.166674	-0.00063
RDWN	Affx-111174209	4D	77898197	0.000281	0.166286	0.000587
RDWN	Affx-110246796	5B	86718020	0.00029	0.165991	-0.00072
RDWN	Affx-111492632	6A	6061236	0.000294	0.165871	-0.00069
RDWN	Affx-111954760	5B	84980775	0.000308	0.165436	0.000712
RDWN	Affx-109459602	6A	6305735	0.000308	0.16543	0.000724
RDWN	Affx-109812831	6A	6296335	0.000322	0.165043	-0.00073
RDWN	Affx-109877045	5B	85661857	0.000327	0.164876	-0.00071
RDWN	Affx-109979441	1B	533184310	0.000337	0.1646	0.000769
RDWN	Affx-109562642	6D	5816621	0.000344	0.164423	-0.00062
RDWN	Affx-111239508	2B	453587050	0.000352	0.16422	-0.00085
RDWN	Affx-88673044	4D	75228711	0.000367	0.163822	0.000578
RDWN	Affx-111614550	5B	84175618	0.000381	0.163477	0.0007
RDWN	Affx-110275420	4D	75273686	0.000391	0.163246	0.000574
RDWN	Affx-111550157	5B	84692531	0.000403	0.162978	0.000699
RDWN	Affx-110881641	5B	74972662	0.000414	0.16272	0.000688
RDWN	Affx-109161517	5B	76160548	0.000415	0.162718	0.000697
RDWN	Affx-111387468	6A	6835832	0.000416	0.162693	-0.00073
RDWN	Affx-88580813	6A	6373927	0.000417	0.162656	0.000903
RDWN	Affx-110396363	6A	5506814	0.000431	0.162362	-0.00062
RDWN	Affx-110277047	6A	5465696	0.000432	0.162337	0.000743
RDWN	Affx-88486868	5B	84936584	0.000441	0.162159	-0.0007
RDWN	Affx-110059352	5D	77738248	0.000464	0.161693	-0.00069
RDWN	Affx-110670198	2B	436000020	0.000469	0.161588	-0.00097
RDWN	Affx-110524086	6A	3866269	0.000473	0.161525	0.000695
RDWN	Affx-109857271	6A	5440636	0.000475	0.161468	0.000703
RDWN	Affx-111932364	4D	77018661	0.000488	0.16123	0.000559
RDWN	Affx-110662909	6A	3793183	0.000558	0.160012	0.000714
RDWN	Affx-111737519	2B	246404735	0.000561	0.15996	-0.00076
RDWN	Affx-111246065	4D	77697819	0.000623	0.159018	0.000537
RDWN	Affx-109570800	5B	75707949	0.000623	0.159009	0.000672
RDWN	Affx-111588818	5B	84653521	0.000627	0.15895	-0.00067
RDWN	Affx-111840298	5D	73764556	0.000641	0.158755	-0.00066
RDWN	Affx-110555910	4B	189644515	0.000651	0.158618	0.000591
RDWN	Affx-110753945	5B	83039426	0.000672	0.158332	-0.00068
RDWN	Affx-111350195	2B	425793881	0.000674	0.158304	-0.00093
RDWN	Affx-110668350	6A	6842226	0.000674	0.158299	-0.00071
RDWN	Affx-111049795	5B	85652037	0.000675	0.158292	0.000663
RDWN	Affx-92561193	3D	571359458	0.000675	0.158286	0.001049
RDWN	Affx-109169038	4B	181164195	0.000681	0.158209	0.000587
RDWN	Affx-110149553	4D	86781839	0.000681	0.158202	0.000551
RDWN	Affx-109839431	5B	80742871	0.000686	0.158138	0.000653
RDWN	Affx-109504562	5B	78486989	0.000701	0.157945	0.000672
RDWN	Affx-111561930	5B	87650456	0.000721	0.157687	0.000656
RDWN	Affx-88475929	5B	87232237	0.000721	0.157687	0.000656
RDWN	Affx-110564336	5B	85945094	0.000722	0.157681	-0.00067
RDWN	Affx-111268028	5B	87959012	0.000739	0.157467	-0.00067
RDWN	Affx-111730062	4D	85116761	0.000748	0.157363	0.000552
RDWN	Affx-108859912	5B	86045144	0.000748	0.157362	0.000664
RDWN	Affx-110903673	4D	81637695	0.000755	0.157275	-0.00054
RDWN	Affx-110028255	5B	78263045	0.000761	0.157202	0.000666
RDWN	Affx-109313056	5B	85213600	0.00078	0.156982	-0.00065
RDWN	Affx-110477238	6A	6395468	0.000863	0.156075	-0.00068
RDWN	Affx-111401912	2B	422990756	0.000872	0.155973	-0.00095
RDWN	Affx-111563301	2B	432029063	0.000872	0.155973	0.000946
RDWN	Affx-111477649	5B	85004968	0.000879	0.15591	0.000649
RDWN	Affx-109503300	5B	82232984	0.000882	0.155872	-0.00064
RDWN	Affx-111007927	6A	6188337	0.000904	0.155654	0.000569
RDWN	Affx-109596928	2B	421260518	0.000912	0.155574	-0.00093
RDWN	Affx-108905447	6D	469095706	0.000949	0.155219	0.000942
RDWN	Affx-88446000	1B	559960606	0.000954	0.155166	-0.00081
RDWN	Affx-111004377	5B	87080834	0.000954	0.155164	-0.00066
SFWN	Affx-111174209	4D	77898197	2.3e-05	0.180902	0.019651
SFWN	Affx-88673044	4D	75228711	4.6e-05	0.174017	0.0189
SFWN	Affx-110275420	4D	75273686	0.000108	0.165895	0.017884
SFWN	Affx-111246065	4D	77697819	0.000109	0.165868	0.017381
SFWN	Affx-110174358	3B	555302838	0.000115	0.165348	0.019779
SFWN	Affx-111932364	4D	77018661	0.000124	0.164596	0.017538
SFWN	Affx-110131678	4D	71178143	0.000141	0.163398	-0.01676
SFWN	Affx-110903673	4D	81637695	0.00015	0.162847	-0.01733
SFWN	Affx-88661145	2B	782018797	0.000268	0.157416	0.019585
SFWN	Affx-88597176	5B	78245788	0.000332	0.155414	0.019261
SFWN	Affx-109718829	6A	499788929	0.000357	0.154739	-0.01636
SFWN	Affx-109979441	1B	533184310	0.000401	0.153663	0.0214
SFWN	Affx-109586566	3D	19290387	0.000424	0.153153	0.019276
SFWN	Affx-111954760	5B	84980775	0.000457	0.152467	0.019036
SFWN	Affx-88780962	5B	86237831	0.000467	0.152258	0.019138
SFWN	Affx-110449315	5B	79465105	0.000479	0.152036	0.018965
SFWN	Affx-111517168	5B	77002513	0.000479	0.152036	0.018965
SFWN	Affx-110246796	5B	86718020	0.000492	0.151777	-0.01894
SFWN	Affx-110617771	4D	142476034	0.000522	0.151243	-0.01644
SFWN	Affx-88540902	5B	78732812	0.000534	0.15103	-0.01885
SFWN	Affx-111126685	2B	782022418	0.000562	0.150557	-0.01824
SFWN	Affx-110088775	4D	239154191	0.000565	0.150511	-0.0165
SFWN	Affx-111397614	2B	783656047	0.000579	0.150288	-0.0188
SFWN	Affx-110405841	2B	784451855	0.000585	0.150191	-0.0183
SFWN	Affx-109313056	5B	85213600	0.000604	0.149893	-0.01825
SFWN	Affx-109655050	5B	83536608	0.00064	0.149368	-0.01847
SFWN	Affx-111049795	5B	85652037	0.000659	0.149107	0.018383
SFWN	Affx-88740744	4B	35634688	0.000661	0.149067	-0.01624
SFWN	Affx-111614550	5B	84175618	0.000663	0.149042	0.018547
SFWN	Affx-110059352	5D	77738248	0.000664	0.149027	-0.0185
SFWN	Affx-110881641	5B	74972662	0.000679	0.148833	0.018269
SFWN	Affx-111220349	4D	168825051	0.000684	0.148756	-0.01623
SFWN	Affx-111840298	5D	73764556	0.000692	0.148651	-0.01818
SFWN	Affx-111550157	5B	84692531	0.000698	0.14858	0.018395
SFWN	Affx-109161517	5B	76160548	0.000701	0.148532	0.01841
SFWN	Affx-109617080	2D	514348182	0.000714	0.148369	-0.02495
SFWN	Affx-110566372	5B	76411502	0.000775	0.147623	-0.01789
SFWN	Affx-109379528	4D	225239128	0.000784	0.147518	-0.01603
SFWN	Affx-109570800	5B	75707949	0.000795	0.147389	0.018155
SFWN	Affx-109877045	5B	85661857	0.000798	0.147351	-0.01822
SFWN	Affx-111588818	5B	84653521	0.000836	0.146925	-0.01795
SFWN	Affx-111432837	5B	404812668	0.000889	0.146374	-0.01793
SFWN	Affx-111561930	5B	87650456	0.000889	0.14637	0.017772
SFWN	Affx-88475929	5B	87232237	0.000889	0.14637	0.017772
SFWN	Affx-88486868	5B	84936584	0.000894	0.146324	-0.01815
SFWN	Affx-111998463	3B	30961304	0.000911	0.146148	-0.0185
SFWN	Affx-109504562	5B	78486989	0.000918	0.146081	0.018083
SFWN	Affx-109503300	5B	82232984	0.000929	0.145971	-0.01754
SFWN	Affx-110028255	5B	78263045	0.00094	0.145868	0.017999
SFWN	Affx-111434051	2B	606938708	0.00099	0.145388	0.024437
SDWN	Affx-110670198	2B	436000020	2e-06	0.242367	-0.00372
SDWN	Affx-111350195	2B	425793881	4e-06	0.235795	-0.00354
SDWN	Affx-111310532	2B	434945192	5e-06	0.232024	0.003552
SDWN	Affx-110641568	2B	435481560	1e-05	0.225995	0.00335
SDWN	Affx-109596928	2B	421260518	1.1e-05	0.225153	-0.00345
SDWN	Affx-88585741	2B	421708573	1.3e-05	0.224149	-0.0034
SDWN	Affx-88699103	2B	435513114	1.4e-05	0.223192	0.003322
SDWN	Affx-109463871	2B	423667581	1.5e-05	0.222522	0.003249
SDWN	Affx-88425798	2D	375362652	1.7e-05	0.221428	-0.0033
SDWN	Affx-111414324	2B	427930062	2.7e-05	0.217017	0.003262
SDWN	Affx-109989423	2B	430758539	2.8e-05	0.216721	-0.00333
SDWN	Affx-111601113	2B	448398290	2.9e-05	0.216374	-0.00331
SDWN	Affx-110237630	2B	428592233	3e-05	0.216123	-0.00329
SDWN	Affx-111174209	4D	77898197	3.4e-05	0.214882	0.00187
SDWN	Affx-110556105	2B	436223149	3.5e-05	0.214697	-0.00323
SDWN	Affx-109617080	2D	514348182	3.9e-05	0.213635	-0.00299
SDWN	Affx-110067379	2B	431787032	4.5e-05	0.212386	0.00329
SDWN	Affx-109276699	2B	427410711	4.9e-05	0.211533	-0.00303
SDWN	Affx-111565882	2B	425121102	5e-05	0.211374	0.003229
SDWN	Affx-111322167	2B	425366351	5.6e-05	0.21039	0.003198
SDWN	Affx-111239508	2B	453587050	5.8e-05	0.21003	-0.00266
SDWN	Affx-110167852	2B	421548905	6e-05	0.209661	0.003061
SDWN	Affx-88741233	2B	422501105	6e-05	0.209661	0.003061
SDWN	Affx-110260590	2B	425753942	6.2e-05	0.209467	-0.00319
SDWN	Affx-88673044	4D	75228711	6.8e-05	0.208633	0.001803
SDWN	Affx-111563301	2B	432029063	6.9e-05	0.208471	0.003145
SDWN	Affx-111401912	2B	422990756	6.9e-05	0.208471	-0.00314
SDWN	Affx-110001087	2B	426597127	6.9e-05	0.208452	-0.00312
SDWN	Affx-111612857	2B	429239386	6.9e-05	0.208452	-0.00312
SDWN	Affx-109627715	2B	432144565	6.9e-05	0.208452	0.003118
SDWN	Affx-109853588	2B	422512523	6.9e-05	0.208452	0.003118
SDWN	Affx-88580792	2B	429258233	6.9e-05	0.208452	0.003118
SDWN	Affx-110180235	2B	435534525	7.6e-05	0.207601	0.003076
SDWN	Affx-109212536	2B	427036272	8e-05	0.207156	-0.00317
SDWN	Affx-88648290	2B	433538683	8.2e-05	0.2069	-0.00309
SDWN	Affx-110224240	2B	427116795	8.2e-05	0.20687	-0.00307
SDWN	Affx-110431315	7B	211684571	8.5e-05	0.206604	0.003057
SDWN	Affx-109059108	2B	426149798	8.5e-05	0.206604	-0.00306
SDWN	Affx-110622634	2B	413899313	8.6e-05	0.206441	0.003055
SDWN	Affx-111022105	2B	435162209	8.6e-05	0.206441	-0.00305
SDWN	Affx-110008685	2B	432897113	9.3e-05	0.205794	0.003051
SDWN	Affx-109313104	2B	247557022	9.3e-05	0.20577	0.002293
SDWN	Affx-88464430	2B	429489441	0.0001	0.205132	0.003041
SDWN	Affx-111801540	2B	430845195	0.00012286	0.203247	-0.00316
SDWN	Affx-109294922	2B	442569158	0.000131354	0.202646	-0.00305
SDWN	Affx-110114464	2B	434975987	0.000138728	0.202155	-0.00298
SDWN	Affx-108905447	6D	469095706	0.000149433	0.201489	0.003019
SDWN	Affx-109004073	2B	429515039	0.000150244	0.20144	-0.00298
SDWN	Affx-109578015	2B	434656429	0.000150244	0.20144	-0.00298
SDWN	Affx-110230503	2B	426776257	0.000150244	0.20144	-0.00298
SDWN	Affx-108925744	2B	429485573	0.000152308	0.201318	-0.00291
SDWN	Affx-110833372	2B	431634957	0.000158396	0.200967	-0.00296
SDWN	Affx-88718224	2D	367921543	0.000164301	0.200639	-0.00294
SDWN	Affx-110069201	2B	425876680	0.000167581	0.200462	-0.00279
SDWN	Affx-111907791	2B	429248096	0.000167801	0.20045	-0.00288
SDWN	Affx-88752443	2B	435685533	0.000169549	0.200357	0.002834
SDWN	Affx-88362107	2B	422875212	0.000174232	0.200114	-0.00296
SDWN	Affx-111870350	2B	246538970	0.000176854	0.19998	-0.00223
SDWN	Affx-111326878	2B	606037476	0.000181141	0.199766	0.003038
SDWN	Affx-108923208	2B	246424603	0.000183055	0.199672	0.00222
SDWN	Affx-88597176	5B	78245788	0.00018497	0.199579	0.002005
SDWN	Affx-111631941	2B	436879682	0.0001914	0.199274	0.002928
SDWN	Affx-110275420	4D	75273686	0.000209318	0.198476	0.001669
SDWN	Affx-88507589	2B	436936286	0.000232121	0.197555	-0.00285
SDWN	Affx-109622501	2B	423808965	0.000232824	0.197528	-0.00287
SDWN	Affx-110143510	2B	441556515	0.000232824	0.197528	-0.00287
SDWN	Affx-110818003	2B	426261677	0.000232824	0.197528	-0.00287
SDWN	Affx-111593661	2B	433803008	0.000232824	0.197528	0.002871
SDWN	Affx-111269573	2B	424650677	0.000235235	0.197436	0.002798
SDWN	Affx-109029657	2B	422505007	0.000239154	0.197289	-0.00279
SDWN	Affx-111246065	4D	77697819	0.000249076	0.196928	0.001601
SDWN	Affx-110783981	2B	428796966	0.000249318	0.196919	-0.00281
SDWN	Affx-109530839	2B	427050800	0.000249318	0.196919	0.002812
SDWN	Affx-109692301	2B	435581455	0.000249318	0.196919	0.002812
SDWN	Affx-109694052	2B	433175578	0.00024975	0.196904	-0.00278
SDWN	Affx-109170967	2B	437008564	0.000249957	0.196896	0.002903
SDWN	Affx-110536135	2B	432440659	0.000264525	0.196393	0.002869
SDWN	Affx-111332171	2B	425800969	0.00026548	0.196361	0.00293
SDWN	Affx-110086211	2B	430242392	0.00026548	0.196361	-0.00293
SDWN	Affx-110279597	2B	423235943	0.00026548	0.196361	-0.00293
SDWN	Affx-110447374	2B	428739586	0.00026548	0.196361	-0.00293
SDWN	Affx-111806057	2B	423951669	0.00026548	0.196361	-0.00293
SDWN	Affx-111096600	2B	440813085	0.000266912	0.196314	-0.00305
SDWN	Affx-110194404	2B	422235750	0.000281899	0.195829	-0.00279
SDWN	Affx-110358510	2B	434956035	0.000281899	0.195829	-0.00279
SDWN	Affx-111037819	2B	430743729	0.000281899	0.195829	-0.00279
SDWN	Affx-111540997	2B	425634851	0.000281899	0.195829	-0.00279
SDWN	Affx-111932364	4D	77018661	0.000285559	0.195714	0.001616
SDWN	Affx-110946857	2B	427774038	0.000293818	0.195462	-0.00288
SDWN	Affx-110383733	2B	436490094	0.000296241	0.195389	-0.00289
SDWN	Affx-88780962	5B	86237831	0.000296454	0.195383	0.001979
SDWN	Affx-88472532	2B	423098537	0.000296715	0.195375	0.002933
SDWN	Affx-110864007	7D	340179751	0.000300623	0.195259	-0.00298
SDWN	Affx-110402588	2B	427947438	0.000301036	0.195247	0.002758
SDWN	Affx-109307693	2B	433874695	0.000301036	0.195247	-0.00276
SDWN	Affx-110805538	2B	436520837	0.000301036	0.195247	-0.00276
SDWN	Affx-111331004	2B	430923411	0.000303975	0.195161	0.002893
SDWN	Affx-111745677	2B	438429494	0.000306175	0.195097	0.002861
SDWN	Affx-88461190	2B	421423093	0.000319187	0.194728	-0.00299
SDWN	Affx-111007151	2B	425502667	0.000326989	0.194515	0.002865
SDWN	Affx-111258284	2B	428299244	0.000326989	0.194515	-0.00286
SDWN	Affx-110566372	5B	76411502	0.000330162	0.194429	-0.0019
SDWN	Affx-110449315	5B	79465105	0.000336043	0.194273	0.001946
SDWN	Affx-111517168	5B	77002513	0.000336043	0.194273	0.001946
SDWN	Affx-109782056	2B	607064966	0.000336767	0.194254	-0.00252
SDWN	Affx-110696902	2D	343555146	0.000348284	0.193957	-0.00284
SDWN	Affx-110205566	2B	429886711	0.00035435	0.193805	0.002824
SDWN	Affx-109869660	2B	424656280	0.00035435	0.193805	-0.00282
SDWN	Affx-88768559	2B	422965755	0.00035435	0.193805	-0.00282
SDWN	Affx-110246796	5B	86718020	0.000361172	0.193636	-0.00194
SDWN	Affx-110903673	4D	81637695	0.000363598	0.193577	-0.00159
SDWN	Affx-110617616	2B	437383465	0.000364525	0.193555	0.00271
SDWN	Affx-110086253	5B	86544686	0.000364647	0.193552	-0.0019
SDWN	Affx-109963299	2B	427762140	0.000371535	0.193386	-0.00283
SDWN	Affx-109718829	6A	499788929	0.000377894	0.193237	-0.00159
SDWN	Affx-109313056	5B	85213600	0.000382126	0.193138	-0.00188
SDWN	Affx-110964702	2B	428428019	0.000383556	0.193106	0.00293
SDWN	Affx-111068554	2B	427103028	0.000383986	0.193096	0.002798
SDWN	Affx-88540902	5B	78732812	0.000388747	0.192987	-0.00193
SDWN	Affx-109655050	5B	83536608	0.000415979	0.19239	-0.00191
SDWN	Affx-88431037	4D	17083837	0.00041729	0.192363	0.001834
SDWN	Affx-109570800	5B	75707949	0.000417638	0.192355	0.001909
SDWN	Affx-109046720	2B	428477902	0.000420469	0.192296	0.002862
SDWN	Affx-110308409	2B	421866306	0.000420469	0.192296	-0.00286
SDWN	Affx-111501992	2B	428935259	0.000420805	0.192289	0.002866
SDWN	Affx-92288757	2D	337395565	0.000428216	0.192135	-0.00279
SDWN	Affx-111614550	5B	84175618	0.000428394	0.192131	0.001911
SDWN	Affx-108926283	2B	377537616	0.00043489	0.191999	0.002764
SDWN	Affx-109625756	2B	426631486	0.000437431	0.191948	-0.0029
SDWN	Affx-111954760	5B	84980775	0.000441677	0.191863	0.001904
SDWN	Affx-109157753	2D	366473586	0.000441707	0.191862	0.00268
SDWN	Affx-111329104	6A	5881692	0.000443582	0.191825	-0.00215
SDWN	Affx-111840298	5D	73764556	0.000451806	0.191663	-0.00187
SDWN	Affx-88740744	4B	35634688	0.000452388	0.191652	-0.00164
SDWN	Affx-111917554	6A	5541511	0.000468222	0.19135	-0.00193
SDWN	Affx-110131678	4D	71178143	0.000470769	0.191302	-0.00149
SDWN	Affx-88560483	2B	435762015	0.000472183	0.191276	-0.00245
SDWN	Affx-111323643	2B	441790001	0.00048146	0.191105	-0.00272
SDWN	Affx-110775181	2B	431342760	0.000483849	0.191061	0.002706
SDWN	Affx-111518046	2B	432628669	0.000483849	0.191061	0.002706
SDWN	Affx-111049795	5B	85652037	0.000486852	0.191007	0.001874
SDWN	Affx-88580813	6A	6373927	0.000502496	0.190729	0.002478
SDWN	Affx-111543991	6A	6839108	0.000514998	0.190514	0.002028
SDWN	Affx-109295963	2D	361409833	0.000517605	0.19047	0.002671
SDWN	Affx-110753945	5B	83039426	0.000521911	0.190397	-0.0019
SDWN	Affx-109161517	5B	76160548	0.000522898	0.19038	0.001881
SDWN	Affx-110881641	5B	74972662	0.000523256	0.190374	0.001859
SDWN	Affx-111352612	2B	432009288	0.00053704	0.190146	0.002703
SDWN	Affx-108887666	2B	427845553	0.000540185	0.190095	0.002804
SDWN	Affx-109673011	2B	421439392	0.000557754	0.189815	-0.00278
SDWN	Affx-111111243	2B	426300930	0.000557754	0.189815	-0.00278
SDWN	Affx-111458392	2B	427695859	0.000557754	0.189815	-0.00278
SDWN	Affx-111550157	5B	84692531	0.000561149	0.189762	0.001871
SDWN	Affx-109812831	6A	6296335	0.000564793	0.189705	-0.00195
SDWN	Affx-111551142	2B	432854161	0.000576271	0.189529	-0.00269
SDWN	Affx-110982878	2B	434968062	0.000578805	0.189491	0.002589
SDWN	Affx-110059352	5D	77738248	0.000587162	0.189365	-0.00186
SDWN	Affx-109503300	5B	82232984	0.000593794	0.189267	-0.00181
SDWN	Affx-109504562	5B	78486989	0.000594577	0.189255	0.001874
SDWN	Affx-109191786	2B	432912448	0.000630117	0.188748	0.002692
SDWN	Affx-88726578	4D	16588261	0.00063763	0.188644	0.002965
SDWN	Affx-109674658	4B	37700884	0.000644065	0.188557	0.001606
SDWN	Affx-88486868	5B	84936584	0.000666246	0.188261	-0.00186
SDWN	Affx-109091310	2B	437012899	0.000670953	0.188199	-0.00271
SDWN	Affx-109231560	2B	422492611	0.000685565	0.188012	0.002715
SDWN	Affx-111266775	2B	429492719	0.000685565	0.188012	-0.00272
SDWN	Affx-111419388	2B	424783622	0.000691477	0.187937	-0.00284
SDWN	Affx-111730064	2B	421862145	0.000691692	0.187934	-0.00272
SDWN	Affx-111588818	5B	84653521	0.000701301	0.187814	-0.00182
SDWN	Affx-110254340	2B	433112002	0.000713404	0.187664	-0.00257
SDWN	Affx-111434051	2B	606938708	0.000735684	0.187397	0.002454
SDWN	Affx-109877045	5B	85661857	0.000752599	0.187199	-0.00183
SDWN	Affx-111561930	5B	87650456	0.000769069	0.18701	0.001795
SDWN	Affx-88475929	5B	87232237	0.000769069	0.18701	0.001795
SDWN	Affx-110911778	3B	30180469	0.000773228	0.186963	0.001497
SDWN	Affx-110989271	5B	87304214	0.000787143	0.186808	0.001819
SDWN	Affx-88596529	3B	37735225	0.000793006	0.186743	-0.00157
SDWN	Affx-88677231	6A	3206264	0.000793495	0.186738	0.001751
SDWN	Affx-109182354	2B	406114890	0.00082681	0.186381	0.002686
SDWN	Affx-111268028	5B	87959012	0.000831235	0.186334	-0.00183
SDWN	Affx-110329677	2B	421923785	0.000841035	0.186232	0.002646
SDWN	Affx-111177637	2B	432124792	0.000841035	0.186232	0.002646
SDWN	Affx-109177363	2B	456705916	0.000848247	0.186158	0.00222
SDWN	Affx-88611376	2B	247615412	0.000873948	0.185899	0.002022
SDWN	Affx-110457647	6A	3917946	0.00088099	0.185829	0.001841
SDWN	Affx-88757813	2D	317944989	0.000882661	0.185813	-0.00262
SDWN	Affx-88787326	2D	373222734	0.000882661	0.185813	-0.00262
SDWN	Affx-109094166	4D	386481252	0.000891154	0.18573	-0.00138
SDWN	Affx-111969538	5B	86868469	0.000897072	0.185672	-0.00176
SDWN	Affx-110038316	1B	505645355	0.000898882	0.185655	-0.00215
SDWN	Affx-110524086	6A	3866269	0.000899197	0.185652	0.001835
SDWN	Affx-109017005	6B	216661565	0.00090353	0.18561	-0.00255
SDWN	Affx-92897136	2B	641102486	0.00091153	0.185534	-0.00245
SDWN	Affx-111750323	2B	421836464	0.000923145	0.185424	0.002643
SDWN	Affx-111773485	2D	350599927	0.000939242	0.185274	-0.00259
SDWN	Affx-110735737	2B	572669085	0.000965394	0.185036	-0.00257
SDWN	Affx-111946895	5B	85966224	0.000966275	0.185028	0.001795
SDWN	Affx-109979441	1B	533184310	0.000972152	0.184976	0.001955
SDWN	Affx-109058543	2B	425102090	0.000974523	0.184955	-0.00274
SDWN	Affx-110028255	5B	78263045	0.00098519	0.18486	0.00179
SDWN	Affx-88444969	4B	37845625	0.000996594	0.184761	0.001531
TFWN	Affx-111174209	4D	77898197	1.6e-05	0.182878	0.029919
TFWN	Affx-88673044	4D	75228711	3.9e-05	0.17423	0.02855
TFWN	Affx-110174358	3B	555302838	5.6e-05	0.170878	0.03099
TFWN	Affx-110275420	4D	75273686	7.9e-05	0.16759	0.027306
TFWN	Affx-111246065	4D	77697819	7.9e-05	0.167556	0.026527
TFWN	Affx-111932364	4D	77018661	7.9e-05	0.16753	0.027019
TFWN	Affx-110903673	4D	81637695	0.000104	0.164949	-0.02657
TFWN	Affx-88597176	5B	78245788	0.000201	0.158726	0.030184
TFWN	Affx-110131678	4D	71178143	0.000263	0.156194	-0.02394
TFWN	Affx-88780962	5B	86237831	0.000267	0.156062	0.030183
TFWN	Affx-110449315	5B	79465105	0.000289	0.155328	0.029793
TFWN	Affx-111517168	5B	77002513	0.000289	0.155328	0.029793
TFWN	Affx-111954760	5B	84980775	0.000299	0.155009	0.029705
TFWN	Affx-88661145	2B	782018797	0.000301	0.15495	0.028921
TFWN	Affx-110246796	5B	86718020	0.000303	0.154876	-0.0297
TFWN	Affx-109655050	5B	83536608	0.000321	0.154349	-0.02947
TFWN	Affx-88540902	5B	78732812	0.000323	0.154279	-0.02962
TFWN	Affx-111614550	5B	84175618	0.000421	0.15184	0.029023
TFWN	Affx-111550157	5B	84692531	0.000421	0.151836	0.028962
TFWN	Affx-110059352	5D	77738248	0.000434	0.151559	-0.02892
TFWN	Affx-110881641	5B	74972662	0.000434	0.151551	0.028594
TFWN	Affx-109161517	5B	76160548	0.000437	0.151483	0.028893
TFWN	Affx-111432837	5B	404812668	0.000438	0.151468	-0.02864
TFWN	Affx-109877045	5B	85661857	0.000438	0.151466	-0.0289
TFWN	Affx-109313056	5B	85213600	0.000439	0.151443	-0.02825
TFWN	Affx-109979441	1B	533184310	0.000474	0.150744	0.031695
TFWN	Affx-111840298	5D	73764556	0.000493	0.150374	-0.02821
TFWN	Affx-88486868	5B	84936584	0.000495	0.150346	-0.02881
TFWN	Affx-111049795	5B	85652037	0.000501	0.150236	0.028361
TFWN	Affx-111588818	5B	84653521	0.000514	0.149997	-0.02823
TFWN	Affx-110566372	5B	76411502	0.000532	0.14968	-0.02781
TFWN	Affx-109570800	5B	75707949	0.00054	0.149539	0.028321
TFWN	Affx-109055035	3B	570630554	0.000578	0.148918	0.026273
TFWN	Affx-109503300	5B	82232984	0.000579	0.148893	-0.02755
TFWN	Affx-111397614	2B	783656047	0.000583	0.148837	-0.02798
TFWN	Affx-109586566	3D	19290387	0.000587	0.14877	0.028023
TFWN	Affx-110149553	4D	86781839	0.000594	0.148666	0.023796
TFWN	Affx-109504562	5B	78486989	0.000609	0.148434	0.028297
TFWN	Affx-111561930	5B	87650456	0.000615	0.148338	0.027696
TFWN	Affx-88475929	5B	87232237	0.000615	0.148338	0.027696
TFWN	Affx-110405841	2B	784451855	0.00063	0.148122	-0.0271
TFWN	Affx-111731002	4D	84309005	0.000648	0.147872	-0.02378
TFWN	Affx-111126685	2B	782022418	0.00068	0.147428	-0.02674
TFWN	Affx-110753945	5B	83039426	0.000697	0.147203	-0.02811
TFWN	Affx-110161992	5B	404423060	0.000711	0.147013	0.027518
TFWN	Affx-110086253	5B	86544686	0.000712	0.147004	-0.02734
TFWN	Affx-110028255	5B	78263045	0.000712	0.147	0.027858
TFWN	Affx-88446000	1B	559960606	0.000807	0.145854	-0.03518
TFWN	Affx-109528132	6A	6584259	0.000809	0.145839	-0.02525
TFWN	Affx-88546137	3B	556031110	0.000817	0.145742	-0.02576
TFWN	Affx-109945638	5B	405789776	0.000831	0.14559	-0.02692
TFWN	Affx-110085069	5B	405189494	0.000882	0.145044	-0.02767
TFWN	Affx-111477649	5B	85004968	0.000882	0.145044	0.027007
TFWN	Affx-110216783	5B	83781127	0.000946	0.144413	-0.02695
TFWN	Affx-109981670	3B	556044117	0.000958	0.144295	-0.02533
TFWN	Affx-111091462	5B	80787606	0.000977	0.144115	0.026605
TFWN	Affx-109478471	5B	78473800	0.000987	0.144021	0.026695
TDWN	Affx-110670198	2B	436000020	5e-06	0.229329	-0.00477
TDWN	Affx-111350195	2B	425793881	1e-05	0.223464	-0.00454
TDWN	Affx-111310532	2B	434945192	1.9e-05	0.217265	0.004483
TDWN	Affx-109596928	2B	421260518	2.5e-05	0.214965	-0.00446
TDWN	Affx-110641568	2B	435481560	2.7e-05	0.214049	0.004285
TDWN	Affx-109463871	2B	423667581	3.8e-05	0.211176	0.004162
TDWN	Affx-88699103	2B	435513114	3.9e-05	0.21074	0.004227
TDWN	Affx-111174209	4D	77898197	4.3e-05	0.209997	0.002482
TDWN	Affx-88425798	2D	375362652	4.3e-05	0.209856	-0.00422
TDWN	Affx-88585741	2B	421708573	4.5e-05	0.209606	-0.00427
TDWN	Affx-111239508	2B	453587050	5.9e-05	0.207037	-0.00359
TDWN	Affx-109313104	2B	247557022	5.9e-05	0.206956	0.003175
TDWN	Affx-109989423	2B	430758539	6.3e-05	0.206361	-0.00428
TDWN	Affx-111414324	2B	427930062	6.6e-05	0.206072	0.004174
TDWN	Affx-110556105	2B	436223149	6.6e-05	0.20601	-0.00419
TDWN	Affx-111601113	2B	448398290	7.2e-05	0.205163	-0.00423
TDWN	Affx-88673044	4D	75228711	7.6e-05	0.204683	0.002408
TDWN	Affx-110237630	2B	428592233	7.8e-05	0.204451	-0.00419
TDWN	Affx-111563301	2B	432029063	9.2e-05	0.202943	0.004164
TDWN	Affx-111401912	2B	422990756	9.2e-05	0.202943	-0.00416
TDWN	Affx-110260590	2B	425753942	9.4e-05	0.202825	-0.0042
TDWN	Affx-110067379	2B	431787032	9.7e-05	0.202478	0.004232
TDWN	Affx-110167852	2B	421548905	9.9e-05	0.202361	0.004005
TDWN	Affx-88741233	2B	422501105	9.9e-05	0.202361	0.004005
TDWN	Affx-111565882	2B	425121102	0.000105924	0.20171	0.004157
TDWN	Affx-111870350	2B	246538970	0.000115922	0.200894	-0.00309
TDWN	Affx-88597176	5B	78245788	0.000118009	0.200733	0.002793
TDWN	Affx-108905447	6D	469095706	0.000120455	0.200548	0.004117
TDWN	Affx-109276699	2B	427410711	0.000121126	0.200498	-0.00386
TDWN	Affx-108923208	2B	246424603	0.000121915	0.200439	0.003077
TDWN	Affx-109617080	2D	514348182	0.000129089	0.199923	-0.00373
TDWN	Affx-110180235	2B	435534525	0.000152709	0.198409	0.003963
TDWN	Affx-110008685	2B	432897113	0.000153691	0.198352	0.003978
TDWN	Affx-109627715	2B	432144565	0.000157163	0.198151	0.003987
TDWN	Affx-109853588	2B	422512523	0.000157163	0.198151	0.003987
TDWN	Affx-88580792	2B	429258233	0.000157163	0.198151	0.003987
TDWN	Affx-110001087	2B	426597127	0.000157163	0.198151	-0.00399
TDWN	Affx-111612857	2B	429239386	0.000157163	0.198151	-0.00399
TDWN	Affx-111329104	6A	5881692	0.000157913	0.198108	-0.00312
TDWN	Affx-111322167	2B	425366351	0.000163974	0.19777	0.004022
TDWN	Affx-88780962	5B	86237831	0.000166061	0.197656	0.002789
TDWN	Affx-88464430	2B	429489441	0.000173243	0.197276	0.003947
TDWN	Affx-88648290	2B	433538683	0.00017483	0.197194	-0.00397
TDWN	Affx-110275420	4D	75273686	0.000181508	0.196858	0.002267
TDWN	Affx-109212536	2B	427036272	0.00018641	0.196619	-0.00404
TDWN	Affx-111917554	6A	5541511	0.000191397	0.196382	-0.00277
TDWN	Affx-110449315	5B	79465105	0.000195023	0.196214	0.002738
TDWN	Affx-111517168	5B	77002513	0.000195023	0.196214	0.002738
TDWN	Affx-110622634	2B	413899313	0.000195998	0.196169	0.003901
TDWN	Affx-111022105	2B	435162209	0.000195998	0.196169	-0.0039
TDWN	Affx-110246796	5B	86718020	0.000212878	0.19543	-0.00272
TDWN	Affx-88540902	5B	78732812	0.00021694	0.195261	-0.00272
TDWN	Affx-110431315	7B	211684571	0.000219358	0.195162	0.003867
TDWN	Affx-109059108	2B	426149798	0.000219358	0.195162	-0.00387
TDWN	Affx-109655050	5B	83536608	0.000219526	0.195155	-0.00271
TDWN	Affx-111246065	4D	77697819	0.000234906	0.19455	0.002162
TDWN	Affx-111932364	4D	77018661	0.000244286	0.194201	0.002199
TDWN	Affx-111543991	6A	6839108	0.00024599	0.194139	0.002883
TDWN	Affx-111954760	5B	84980775	0.000251558	0.193939	0.002685
TDWN	Affx-111614550	5B	84175618	0.000254416	0.193838	0.002684
TDWN	Affx-110457647	6A	3917946	0.000261153	0.193605	0.002726
TDWN	Affx-111631941	2B	436879682	0.000272759	0.193218	0.003853
TDWN	Affx-110114464	2B	434975987	0.000276948	0.193082	-0.00384
TDWN	Affx-110566372	5B	76411502	0.000285737	0.192804	-0.00259
TDWN	Affx-109313056	5B	85213600	0.00029898	0.192401	-0.00259
TDWN	Affx-109570800	5B	75707949	0.000301161	0.192337	0.002644
TDWN	Affx-109812831	6A	6296335	0.000302907	0.192285	-0.00275
TDWN	Affx-110224240	2B	427116795	0.000304997	0.192224	-0.00378
TDWN	Affx-111801540	2B	430845195	0.000307647	0.192147	-0.004
TDWN	Affx-88580813	6A	6373927	0.000312844	0.191998	0.003453
TDWN	Affx-110881641	5B	74972662	0.000313011	0.191994	0.002614
TDWN	Affx-109294922	2B	442569158	0.000316135	0.191905	-0.00386
TDWN	Affx-109161517	5B	76160548	0.000317126	0.191878	0.002643
TDWN	Affx-111840298	5D	73764556	0.000319359	0.191815	-0.0026
TDWN	Affx-88752443	2B	435685533	0.000325409	0.191649	0.003647
TDWN	Affx-111550157	5B	84692531	0.00033012	0.191521	0.002636
TDWN	Affx-111593661	2B	433803008	0.000333846	0.191421	0.003773
TDWN	Affx-109622501	2B	423808965	0.000333846	0.191421	-0.00377
TDWN	Affx-110143510	2B	441556515	0.000333846	0.191421	-0.00377
TDWN	Affx-110818003	2B	426261677	0.000333846	0.191421	-0.00377
TDWN	Affx-110903673	4D	81637695	0.000334206	0.191412	-0.00215
TDWN	Affx-111269573	2B	424650677	0.000334814	0.191396	0.003676
TDWN	Affx-111049795	5B	85652037	0.000345171	0.191126	0.002599
TDWN	Affx-110086253	5B	86544686	0.000345523	0.191116	-0.00258
TDWN	Affx-88718224	2D	367921543	0.000354685	0.190884	-0.00375
TDWN	Affx-110059352	5D	77738248	0.000357469	0.190815	-0.00262
TDWN	Affx-110753945	5B	83039426	0.000363983	0.190655	-0.00264
TDWN	Affx-109004073	2B	429515039	0.000365451	0.190619	-0.00377
TDWN	Affx-109578015	2B	434656429	0.000365451	0.190619	-0.00377
TDWN	Affx-110230503	2B	426776257	0.000365451	0.190619	-0.00377
TDWN	Affx-88362107	2B	422875212	0.000379234	0.190292	-0.00378
TDWN	Affx-88486868	5B	84936584	0.000385616	0.190144	-0.00262
TDWN	Affx-109877045	5B	85661857	0.000387735	0.190095	-0.0026
TDWN	Affx-88611376	2B	247615412	0.000397451	0.189876	0.002905
TDWN	Affx-109504562	5B	78486989	0.000408702	0.18963	0.002609
TDWN	Affx-111907791	2B	429248096	0.000414464	0.189506	-0.00364
TDWN	Affx-111529105	6A	6567618	0.000422622	0.189334	-0.00218
TDWN	Affx-109528132	6A	6584259	0.000424666	0.189291	-0.00234
TDWN	Affx-110833372	2B	431634957	0.000429268	0.189196	-0.00371
TDWN	Affx-109503300	5B	82232984	0.000439897	0.18898	-0.00251
TDWN	Affx-111588818	5B	84653521	0.000451063	0.188759	-0.00254
TDWN	Affx-111068554	2B	427103028	0.000452983	0.188721	0.003726
TDWN	Affx-109979441	1B	533184310	0.000457572	0.188632	0.002803
TDWN	Affx-111914319	6A	5901663	0.000460322	0.188579	-0.00287
TDWN	Affx-110524086	6A	3866269	0.000470975	0.188377	0.0026
TDWN	Affx-109029657	2B	422505007	0.000474755	0.188307	-0.00357
TDWN	Affx-109170967	2B	437008564	0.000479489	0.18822	0.003729
TDWN	Affx-109718829	6A	499788929	0.000498198	0.187882	-0.00209
TDWN	Affx-111561930	5B	87650456	0.000499365	0.187862	0.002514
TDWN	Affx-88475929	5B	87232237	0.000499365	0.187862	0.002514
TDWN	Affx-88740744	4B	35634688	0.000512911	0.187626	-0.00219
TDWN	Affx-110069201	2B	425876680	0.000518529	0.18753	-0.00346
TDWN	Affx-109530839	2B	427050800	0.000520241	0.187501	0.003588
TDWN	Affx-109692301	2B	435581455	0.000520241	0.187501	0.003588
TDWN	Affx-110783981	2B	428796966	0.000520241	0.187501	-0.00359
TDWN	Affx-110086211	2B	430242392	0.00052362	0.187444	-0.00375
TDWN	Affx-110279597	2B	423235943	0.00052362	0.187444	-0.00375
TDWN	Affx-110447374	2B	428739586	0.00052362	0.187444	-0.00375
TDWN	Affx-111806057	2B	423951669	0.00052362	0.187444	-0.00375
TDWN	Affx-111332171	2B	425800969	0.00052362	0.187444	0.003754
TDWN	Affx-109694052	2B	433175578	0.00052691	0.187389	-0.00354
TDWN	Affx-111268028	5B	87959012	0.000529491	0.187346	-0.00258
TDWN	Affx-108925744	2B	429485573	0.000533504	0.18728	-0.00358
TDWN	Affx-88507589	2B	436936286	0.000542786	0.187128	-0.0036
TDWN	Affx-110536135	2B	432440659	0.000546848	0.187062	0.003661
TDWN	Affx-110946857	2B	427774038	0.000556469	0.186909	-0.0037
TDWN	Affx-110383733	2B	436490094	0.000572886	0.186654	-0.00371
TDWN	Affx-110131678	4D	71178143	0.00058193	0.186516	-0.00197
TDWN	Affx-111326878	2B	606037476	0.000586335	0.18645	0.003742
TDWN	Affx-111331004	2B	430923411	0.000606436	0.186154	0.003697
TDWN	Affx-111492632	6A	6061236	0.000610686	0.186093	-0.00245
TDWN	Affx-111737519	2B	246404735	0.000611677	0.186078	-0.00283
TDWN	Affx-110028255	5B	78263045	0.00061778	0.185991	0.002518
TDWN	Affx-110205566	2B	429886711	0.000622656	0.185922	0.003644
TDWN	Affx-109869660	2B	424656280	0.000622656	0.185922	-0.00364
TDWN	Affx-88768559	2B	422965755	0.000622656	0.185922	-0.00364
TDWN	Affx-109307693	2B	433874695	0.000627569	0.185853	-0.00351
TDWN	Affx-110805538	2B	436520837	0.000627569	0.185853	-0.00351
TDWN	Affx-110402588	2B	427947438	0.000627569	0.185853	0.003513
TDWN	Affx-110864007	7D	340179751	0.00064249	0.185647	-0.00379
TDWN	Affx-111007151	2B	425502667	0.000644673	0.185618	0.003665
TDWN	Affx-111258284	2B	428299244	0.000644673	0.185618	-0.00366
TDWN	Affx-110194404	2B	422235750	0.00065727	0.185448	-0.00353
TDWN	Affx-110358510	2B	434956035	0.00065727	0.185448	-0.00353
TDWN	Affx-111037819	2B	430743729	0.00065727	0.185448	-0.00353
TDWN	Affx-111540997	2B	425634851	0.00065727	0.185448	-0.00353
TDWN	Affx-111477649	5B	85004968	0.000658822	0.185427	0.00247
TDWN	Affx-88472532	2B	423098537	0.000677329	0.185185	0.00371
TDWN	Affx-111745677	2B	438429494	0.000695692	0.184951	0.003617
TDWN	Affx-109782056	2B	607064966	0.000710471	0.184767	-0.0032
TDWN	Affx-111969538	5B	86868469	0.000714248	0.18472	-0.00242
TDWN	Affx-111096600	2B	440813085	0.000722551	0.184619	-0.0038
TDWN	Affx-109674658	4B	37700884	0.000731873	0.184507	0.002139
TDWN	Affx-110564336	5B	85945094	0.000740025	0.18441	-0.00249
TDWN	Affx-109963299	2B	427762140	0.000744587	0.184357	-0.00362
TDWN	Affx-88461190	2B	421423093	0.000747475	0.184323	-0.00377
TDWN	Affx-109459602	6A	6305735	0.000754566	0.18424	0.002523
TDWN	Affx-88596529	4B	37735225	0.000773776	0.184021	-0.00213
TDWN	Affx-110216783	5B	83781127	0.000779274	0.183959	-0.00245
TDWN	Affx-111946895	5B	85966224	0.000780634	0.183944	0.002472
TDWN	Affx-109177363	2B	456705916	0.000781296	0.183936	0.003012
TDWN	Affx-110989271	5B	87304214	0.000785166	0.183893	0.002457
TDWN	Affx-109077639	4D	380144075	0.000786538	0.183878	0.002153
TDWN	Affx-111501992	2B	428935259	0.000795823	0.183775	0.003672
TDWN	Affx-88677231	6A	3206264	0.000814177	0.183576	0.002344
TDWN	Affx-109046720	2B	428477902	0.000816384	0.183553	0.003659
TDWN	Affx-110308409	2B	421866306	0.000816384	0.183553	-0.00366
TDWN	Affx-110911778	3B	30180469	0.000817138	0.183545	0.002002
TDWN	Affx-110779838	5B	83657303	0.000827702	0.183433	0.002448
TDWN	Affx-109681876	5B	84424816	0.000827777	0.183432	0.002514
TDWN	Affx-110617616	2B	437383465	0.000853504	0.183165	0.003412
TDWN	Affx-108926283	2B	377537616	0.000860276	0.183096	0.003525
TDWN	Affx-110964702	2B	428428019	0.000862787	0.183071	0.003702
TDWN	Affx-108859912	5B	86045144	0.000864728	0.183051	0.002438
TDWN	Affx-88622603	1D	435507664	0.000884139	0.182858	0.002426
TDWN	Affx-110696902	2D	343555146	0.000884875	0.182851	-0.00355
TDWN	Affx-110149553	4D	86781839	0.000911097	0.182596	0.00201
TDWN	Affx-111352612	2B	432009288	0.000916271	0.182547	0.003488
TDWN	Affx-111598972	5B	83902384	0.000952181	0.182213	-0.00244
TDWN	Affx-111998463	3B	30961304	0.000963763	0.182107	-0.0024
TDWN	Affx-109586566	3D	19290387	0.000973242	0.182022	0.002346
TDWN	Affx-109625756	2B	426631486	0.000976002	0.181998	-0.00367
TDWN	Affx-109839431	5B	80742871	0.000991182	0.181864	0.002355
TDWN	Affx-88444969	4B	37845625	0.000994937	0.181831	0.002062
